# Supplementary material for: Sex-Specific Effects of Dietary Factors on Sarcopenic Obesity in Korean Elderly: A Nationwide Cross-Sectional Study
Source: MDPI journal article supplement (doi:10.3390/nu16081175), 2024-04-15
Supplement: s1 [file s1]

## Supplementary Table

Table S1. Korean Healthy Eating Index components and standards for scoring

| Classification (No. of components) | Components                                                                      | Score range | Standard for maximum score                                                                                                                                                                                                                                | Standard for minimum score            |
|------------------------------------|---------------------------------------------------------------------------------|-------------|-----------------------------------------------------------------------------------------------------------------------------------------------------------------------------------------------------------------------------------------------------------|---------------------------------------|
| Adequacy (8)                       | Have breakfast*                                                                 | 0-10        | 5-7 times/w                                                                                                                                                                                                                                               | 0 times/w                             |
|                                    | Mixed grains intake <sup>*,†</sup>                                              | 0-5         | ≥ 0.3 serving/d                                                                                                                                                                                                                                           | 0 serving/d                           |
|                                    | Total fruits intake <sup>†</sup>                                                | 0-5         | <ul style="list-style-type: none"> <li>• Men aged 19-64 years: ≥ 3 serving/d</li> <li>• Men aged 65 years and overs: ≥ 2 serving/d</li> <li>• Women aged 19-64 years: ≥ 2 serving/d</li> <li>• Women aged 65 years and overs: ≥ 1 serving/d</li> </ul>    | 0 serving/d                           |
|                                    | Fresh fruits intake <sup>*,†</sup>                                              | 0-5         | <ul style="list-style-type: none"> <li>• Men aged 19-64 years: ≥ 1.5 serving/d</li> <li>• Women aged 19-64 years: ≥ 1 serving/d</li> <li>• Men aged 65 years and overs: ≥ 1 serving/d</li> <li>• Women aged 65 years and over: ≥ 0.5 serving/d</li> </ul> | 0 serving/d                           |
|                                    | Total vegetables intake <sup>†</sup>                                            | 0-5         | <ul style="list-style-type: none"> <li>• Men and women aged 19-64 years: ≥ 8 serving/d</li> <li>• Men aged 65 years and overs: ≥ 8 serving/d</li> <li>• Women aged 65 years and overs: ≥ 6 serving/d</li> </ul>                                           | 0 serving/d                           |
|                                    | Vegetables intake excluding Kimchi and pickled vegetables intake <sup>*,†</sup> | 0-5         | <ul style="list-style-type: none"> <li>• Men and women aged 19-64 years: ≥ 5 serving/d</li> <li>• Men aged 65 years and overs: ≥ 5 serving/d</li> <li>• Women aged 65 years and overs: ≥ 3 serving/d</li> </ul>                                           | 0 serving/d                           |
|                                    | Meat, fish, eggs and beans intake <sup>†</sup>                                  | 0-10        | <ul style="list-style-type: none"> <li>• Men aged 19-64 years: ≥ 5 serving/d</li> <li>• Women aged 19-64 years: ≥ 4 serving/d</li> <li>• Men aged 65 years and overs: ≥ 4 serving/d</li> <li>• Women aged 65 years and overs: ≥ 2.5 serving/d</li> </ul>  | 0 serving/d                           |
|                                    | Milk and milk products intake <sup>†</sup>                                      | 0-10        | ≥ 1 serving/d                                                                                                                                                                                                                                             | 0 serving/d                           |
| Moderation (3)                     | Percentage of energy from saturated fatty acid <sup>†,‡</sup>                   | 0-10        | ≤ 7% of total energy intake                                                                                                                                                                                                                               | > 10% of total energy intake          |
|                                    | Sodium intake <sup>†,§</sup>                                                    | 0-10        | ≤ 2,000 mg/d                                                                                                                                                                                                                                              | > 6,500 mg/d                          |
|                                    | Percentage of energy from sweets and beverages <sup>†</sup>                     | 0-10        | ≤ 10% of total energy intake                                                                                                                                                                                                                              | > 20% of total energy intake          |
| Balance of energy intake (3)       | Percentage of energy from carbohydrate <sup>†,§</sup>                           | 0-5         | 55-65% of total energy intake                                                                                                                                                                                                                             | <50% or > 75% of total energy intake  |
|                                    | Percentage of energy intake from fat <sup>†,‡,§</sup>                           | 0-5         | 15-30% of total energy intake                                                                                                                                                                                                                             | < 10% or > 35% of total energy intake |
|                                    | Energy intake <sup>†,§</sup>                                                    | 0-5         | 75-125% of the estimated energy intake requirement (EER)                                                                                                                                                                                                  | < 60% or > 140% of EER                |

\*Dietary guidelines for Korean adults

†Dietary Reference Intake for Koreans 2015

‡Recommendation criteria of WHO/FAO

§15 or 85 percentile value in Korean adults aged 19 years and over

From Yook et al. J Nutr Health 2015, 48, 419-428. <http://dx.doi.org/10.4163/jnh.2015.48.5.419>
